# Supplementary material for: FMO3 as a novel prognostic biomarker and therapeutic target in non-small cell lung cancer by attenuating endoplasmic reticulum stress
Source: Research Square preprint supplement (doi:10.21203/rs.3.rs-7984231/v1), 2025-11-17

**Supporting Information**

**Figure S1:** Validation of stable FMO3-overexpressing and knockdown cell lines by Western blot. (A) Western blot analysis of FMO3 protein levels in normal bronchial epithelial cells (HBEAS-2B) and NSCLC cell lines (A549, H1299, H1703). (B) Representative Western blot images of FMO3 protein levels in engineered cell lines. The PVDF membranes were cropped at the molecular weight range corresponding to the target protein regions before antibody incubation. The original blots are shown right in the middle. Data normalized to GAPDH, n = 3. *p < 0.05, **p < 0.01, ***p < 0.001, ****p < 0.0001, ns: no significance.


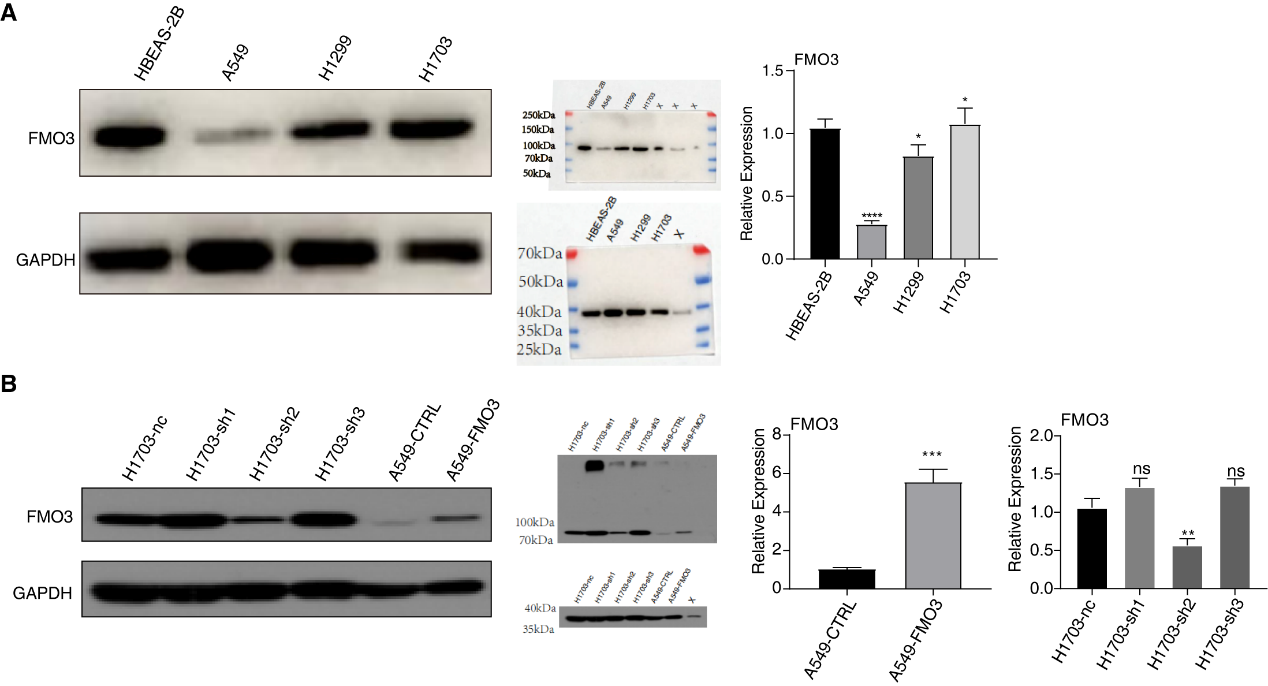


Figure S2: The original images of blots exhibited in Figure 4B.


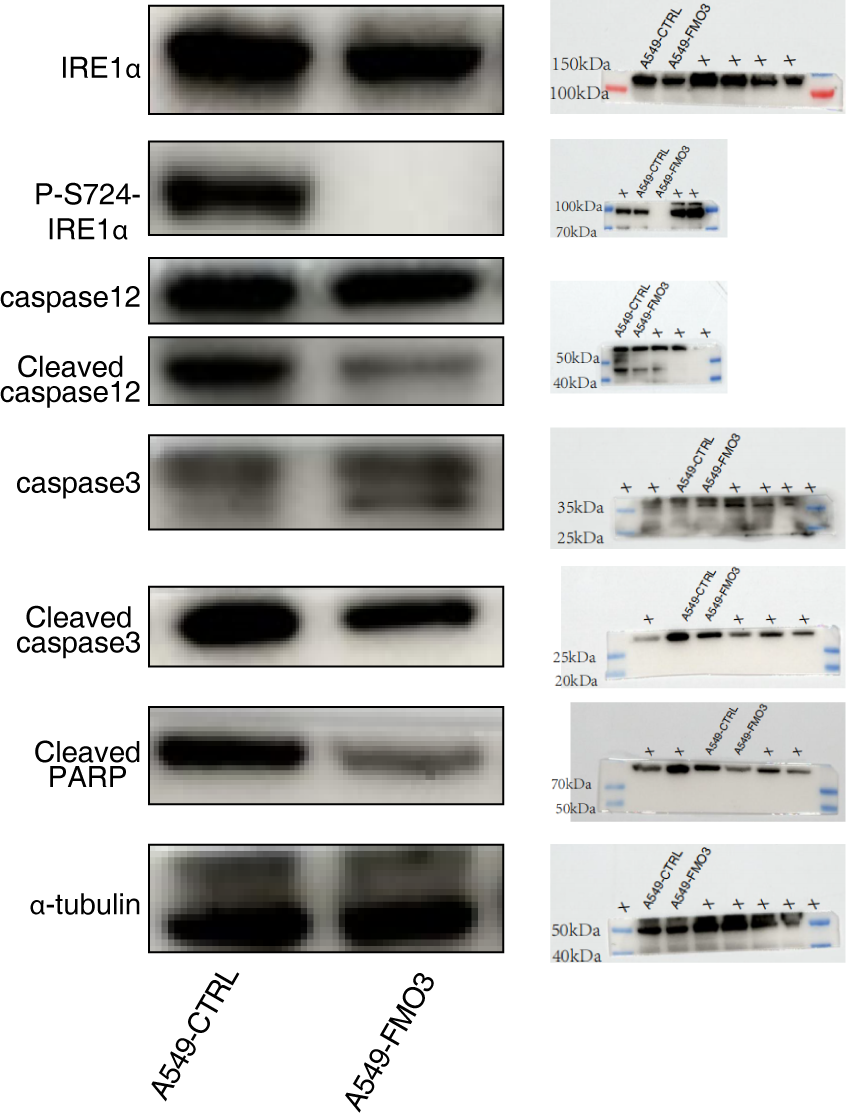

Supplement: Supplementary file 1 [file c51a3c9af8716ae223c56606.docx]
